# Supplementary material for: The Incidence and Genetic Diversity of Apple Mosaic Virus (ApMV) and Prune Dwarf Virus (PDV) in Prunus Species in Australia
Source: Viruses. 2018 Mar 19;10(3):136. doi: 10.3390/v10030136 (PMC5869529; doi:10.3390/v10030136)
Supplement: Supplementary file 1 [file viruses-10-00136-s001.xlsx]

## Sheet: Supplementary Table 1
Table S1. The origin, host and the GenBank accession number of the apple mosaic virus (ApMV) and prune dwarf virus (PDV) RNA1, RNA2 and RNA3 sequences that were used for phylogenetic analysis in this study
Apple mosaic virus (ApMV)				Prune dwarf virus (PDV)
RNA segment	Origin	Host	Accession No.	RNA segment	Origin	Host	Accession No.
ApMV RNA1	India	Apple	FN564148	PDV RNA1	Canada	Cherry	KU215408
	USA	Apple	AF174584		Germany	Cherry	KU215405
	India	Apple	HE574162		Moldova	Cherry	KU215402
ApMV RNA2	USA	Apple	AF174585		Canada	Cherry	U57648
	India	Apple	HE574163	PDV RNA2	Canada	Cherry	KU215409
ApMV RNA3	USA	Apple	L03726		Germany	Cherry	KU215406
	Germany	Apple	S78319		Moldova	Cherry	KU215403
	Czech	Pear	AY054389		USA	Unknown	AF277662
	Czech	Almond	AY054388	PDV RNA3	Germany	Cherry	KU215407
	Czech	Hop	AY054387		Moldova	Cherry	KU215404
	Czech	Prune	AY054386		Czech	Plum	AF208747
	Czech	Apple	AY054385		Czech	Plum	AF208746
	Poland	Hazel	HG328279		Czech	Plum	AF208745
	Poland	Hazel	HG328278		Czech	Peach	AF208743
	Poland	Hazel	HG328277		Czech	Peach	AF208742
	Poland	Hazel	HG328276		Czech	Cherry	AF208741
	Poland	Rose	HG328271		Czech	Cherry	AF208740
	Belarus	Apple	HG328270		Portugal	Almond	AF202117
	Belarus	Apple	HG328269		Turkey	Cherry	KF718680
	Slovakia	Apple	HG328268		Turkey	Cherry	KF718679
	Poland	Apple	HG328267		Turkey	Cherry	KF718678
	Poland	Apple	HG328266		Turkey	Cherry	KF718677
	Poland	Apple	HG328265		China	Cherry	KC965106
	Poland	Apple	HG328264		Italy	Cherry	GU066795
	Poland	Apple	HG328263		Italy	Cherry	GU066794
	Italy	Apricot	HE866962		Italy	Cherry	GU066793
	India	Apple	HE574164		USA	Cherry	GU066792
	USA	Apple	U15608		Poland	Cherry	GU066791
	Korea	Apple	AF548367		Poland	Cherry	GU066790
	Italy	Pear	AY542546		Poland	Cherry	GU066789
	Czech	Pear	AY542545		Portugal	Almond	AY646849
	Czech	Pear	AY542544		Portugal	Almond	AY646840
	Belgium	Apple	AY542541		Portugal	Almond	AY646839
	Brazil	Apple	GQ131805		Portugal	Almond	AY646838
	China	Apple	AM490197		Poland	Cherry	U31310
	Czech	Apple	LT574871		Turkey	Cherry	EF524273
	Czech	Lichen	KC469071		Turkey	Cherry	EF524272
	Czech	Lichen	KC469070		Turkey	Cherry	EF524271
	Antarctica	Lichen	KC469068		Turkey	Apricot	EF524264
	Norway	Lichen	KC469067		Brazil	Peach	FJ360750
	Korea	Apple	AY125977		Argentina	Unknown	AF317089
	Australia	Hop	AF473596		Poland	Cherry	GU181406
	Australia	Hop	AF473595		Poland	Cherry	GU181405
	Australia	Hop	AF473594		Italy	Cherry	GU181404
	Australia	Hop	AF473593		Italy	Cherry	GU181399
	Belarus	Plum	HG328280		Italy	Plum	GU181402
	Poland	Plum	HG328281		Poland	Plum	GU181401
	Poland	Hazel	HG328282		Italy	Almond	GU181398
	Poland	Hazel	HG328283		China	Cherry	JF333587
	Poland	Hazel	HG328284		Moldova	Cherry	AY554278
	Poland	Hazel	HG328285		Hungary	Cherry	AY554277
					Poland	Apricot	EU170008
					Poland	Apricot	EU170007
					Poland	Peach	EU169998
					USA	Squash	L28145
					Turkey	Cherry	KF718670
					Hungary	Cherry	AY554275
					Poland	Cherry	GU181400
					Turkey	Cherry	EF524267

## Sheet: Supplementary Table 2
Table S2. The origin, host, length of full genome sequence and the corresponding GenBank accession number of the apple mosaic virus (ApMV) and prune dwarf virus (PDV) RNA1, RNA2 and RNA3 genome segments that were used for phylogenetic analysis in this study
RNA segment	Isolate	Origin	Prunus host	Length (nt)	Accession No.
ApMV RNA1	K75	Australia	Plum (P. domestica)	3474	KY883318
		USA	Apple (Malus domestica)	3476	AF174584
		India	Apple (Malus domestica)	3476	HE574162
ApMV RNA2	K75	Australia	Plum (P. domestica)	2984	KY883319
		USA	Apple (Malus domestica)	2979	AF174585
		India	Apple (Malus domestica)	2977	HE574163
ApMV RNA3	K75	Australia	Plum (P. domestica)	1894	KY883320
		India	Apple (Malus domestica)	1895	HE574164
		Belarus	Plum (P. domestica)	1887	HG328280
		Poland	Plum (P. domestica)	1887	HG328281
		Poland	Hazel (Corylus avellana)	1939	HG328282
		Poland	Hazel (Corylus avellana)	1939	HG328283
		Poland	Hazel (Corylus avellana)	1939	HG328284
		Poland	Hazel (Corylus avellana)	1934	HG328285
		USA	Apple (Malus domestica)	1895	U15608
PDV RNA1	NS9	Australia	Peach (P. persica)	3372	KY883326
	PCH4	Australia	Peach (P. persica)	3377	KY883327
		Canada	Cherry (P. avium)	3374	U57648
PDV RNA2	NS9	Australia	Peach (P. persica)	2583	KY883328
	PCH4	Australia	Peach (P. persica)	2580	KY883329
		USA	Unknown	2578	AF277662
PDV RNA3	NS9	Australia	Peach (P. persica)	2126	KY883330
	PCH4	Australia	Peach (P. persica)	2148	KY883331
		USA	Squash (Cucurbita maxima)	2129	L28145

## Sheet: Supplementary Table 3
Table S3. The number of raw sequences reads generated from the next generation amplicon sequencing of apple mosaic virus (ApMV) methyltransferase (MT), RNA dependent RNA polymerase (RdRp) and coat protein (CP) partial gene segments on RNA1, RNA2 and RNA3 respectively and the number of reads remaining after trimming
ApMV	RNA1 (Partial MT gene: 173bp)		RNA2 (Partial RdRp gene: 364bp)		RNA3 (Partial CP gene: 452bp)
Plant ID	No. of raw reads	No. of reads after trim	No. of raw reads	No. of reads after trim	No. of raw reads	No. of reads after trim
K73	52095	48587	22556	20384	36582	34454
K74	15780	14740	26682	24659	67110	62852
K75	55721	51711	20967	19328	59223	55305
M35	45201	42301	18664	16127	19561	18273
M36	18190	15409	22387	21249	14027	12589
Total	186987	172748	111256	101747	196503	183473

## Sheet: Supplementary Table 4
Table S4. The number of raw sequences reads generated from the next generation amplicon sequencing of prune dwarf virus (PDV) methyltransferase (MT), RNA dependent RNA polymerase (RdRp) and coat protein (CP) partial gene segments on RNA1, RNA2 and RNA3 respectively and the number of reads remaining after trimming
PDV	RNA1 (Partial MT gene: 193bp)		RNA2 (Partial RdRp gene: 358bp)		RNA3 (Partial CP gene: 396bp)
Plant ID	No. of raw reads	No. of reads after trim	No. of raw reads	No. of reads after trim	No. of raw reads	No. of reads after trim
CNS3	17151	16020	51878	48112	59983	56440
CNS6	20585	18060	23093	21083	20890	19377
K76	23326	20460	14235	12842	18079	16638
NM20	13653	12330	14777	12127	26515	25249
NM21	17325	15387	18289	16178	13109	11833
NS3	27848	26188	18515	17450	22120	17205
NS5	46153	42242	26872	25272	90935	85141
NS7	12085	10542	15292	13794	85706	81229
NS9	29145	27752	35206	31725	50780	47676
PCH4	50747	47346	23687	22097	85134	79293
Q1	32906	30758	14717	12866	28544	26150
Q10	13551	11998	55619	50068	25525	23349
Tas6	23089	21382	33643	31649	101087	94629
Total	327564	300465	345823	315263	628407	584209

## Sheet: Supplementary Table 5
Table S5. The phylo-groups identified from phylogenetic analysis of amplicon sequence variants from partial gene segments of methyltransferase (MT), RNA dependent RNA polymerase (RdRp) and coat protein (CP) genes on RNA1, RNA2 and RNA3 respectively of the Australian apple mosaic virus (ApMV) and prune dwarf virus (PDV) isolates and GenBank isolate sequences
ApMV RNA1 (Partial MT gene: 173bp)			PDV RNA1 (Partial MT gene: 193bp)
Sample ID/ GenBank accession	Host	Phylo-group	Sample ID/GenBank accession	Host	Phylo-group
K73	Almond	1	CNS3	Peach	1
K74	Plum	1	CNS6	Peach	1
K75	Plum	1	K76	Almond	1
M35	Almond	1	NM20	Almond	1
M36	Almond	1	NM21	Almond	1
FN564148	Apple	2	NS3	Peach	1
AF174584	Apple	2	NS5	Peach	1
HE574162	Apple	2	NS7	Peach	1
			NS9	Peach	1
			PCH4	Peach	1
			Q1	Apricot	1
			Q10	Plum	1
			Tas6	Peach	1
			U57648	Cherry	1
			KU215408	Cherry	2
			KU215405	Cherry	2
			KU215402	Cherry	2
ApMV RNA2 (Partial RdRp gene: 364bp)			PDV RNA2 (Partial RdRp gene: 358bp)
Sample ID/ GenBank accession	Host	Phylo-group	Sample ID/ GenBank accession	Host	Phylo-group
K73	Almond	1	CNS3	Peach	1 & 2
K74	Plum	1	NM21	Almond	1
K75	Plum	1	NS3	Peach	1
M35	Almond	1	NS5	Peach	1
M36	Almond	1	NS7	Peach	1
AF174585	Apple	2	NS9	Peach	1
HE574163	Apple	2	CNS6	Peach	2
			K76	Almond	2
			NM20	Almond	2
			PCH4	Peach	2
			Q1	Apricot	2
			Q10	Plum	2
			Tas6	Peach	2
			AF277662	Unknown	2
			KU215409	Cherry	3
			KU215406	Cherry	3
			KU215403	Cherry	3
ApMV RNA3 (Partial CP gene: 452bp)			PDV RNA3 (Partial CP gene: 396bp)
Sample ID/ GenBank accession	Host	Phylo-group	Sample ID/ GenBank accession	Host	Phylo-group
AF473596	Hop	1	KC965106	Cherry	1
AF473595	Hop	1	JF333587	Cherry	1
AF473594	Hop	1	GU181399	Cherry	1
AF473593	Hop	1	EU170008	Apricot	1
AY054387	Hop	1	EU170007	Apricot	1
S78319	Apple	1	EU169998	Peach	1
AY054389	Pear	1	EF524264	Apricot	1
AY054386	Prune	1	GU181398	Almond	1
HE866962	Apricot	1	AF317089	Unknown	1
K73	Almond	2	KF718680	Cherry	1
K74	Plum	2	KF718677	Cherry	1
K75	Plum	2	EF524272	Cherry	1
M35	Almond	2	EF524271	Cherry	1
M36	Almond	2	FJ360750	Peach	1
HG328280	Plum	2	GU181404	Cherry	1
HG328281	Plum	2	KF718678	Cherry	1
HG328264	Apple	2	GU181406	Cherry	1
HG328270	Apple	2	GU181405	Cherry	1
HG328269	Apple	2	CNS3	Peach	2
HG328268	Apple	2	CNS6	Peach	2
HG328263	Apple	2	K76	Almond	2
HG328266	Apple	2	NM20	Almond	2
HG328265	Apple	2	NM21	Almond	2
HG328267	Apple	2	NS3	Peach	2
GQ131805	Apple	2	NS5	Peach	2
LT574871	Apple	2	NS7	Peach	2
AY542544	Pear	2	NS9	Peach	2
AY542546	Pear	2	PCH4	Peach	2
AY542545	Pear	2	L28145	Squash	2
HG328271	Rose	2	AF208742	Peach	2
KC469071	Lichen	2	GU066793	Cherry	2
KC469070	Lichen	2	AF208740	Cherry	2
KC469068	Lichen	2	GU066792	Cherry	2
KC469067	Lichen	2	GU066795	Cherry	2
L03726	Apple	3	GU066789	Cherry	2
AY054385	Apple	3	KU215407	Cherry	2
AF548367	Apple	3	AF208743	Peach	2
AY125977	Apple	3	GU066791	Cherry	2
HE574164	Apple	3	AY554277	Cherry	2
U15608	Apple	3	GU066794	Cherry	2
HG328279	Hazel	4	GU181402	Plum	2
HG328278	Hazel	4	AF208747	Plum	2
HG328277	Hazel	4	AF208746	Plum	2
HG328276	Hazel	4	AF208745	Plum	2
AY054388	Almond	4	AY554278	Cherry	2
HG328282	Hazel	4	AF208741	Cherry	2
HG328283	Hazel	4	GU066790	Cherry	2
HG328284	Hazel	4	GU181401	Plum	2
HG328285	Hazel	4	AY646849	Almond	3
			AY646839	Almond	3
			AF202117	Almond	3
			AY646840	Almond	3
			AY646838	Almond	3
			EF524267	Cherry	3
			KF718679	Cherry	3
			EF524273	Cherry	3
			KF718670	Cherry	3
			AY554275	Cherry	3
			KU215404	Cherry	3
			U31310	Cherry	3
			GU181400	Cherry	3

## Sheet: Supplementary Table 6
Table S6. The % identity cut-off of apple mosaic virus (ApMV) and prune dwarf virus (PDV) amplicon sequence variants from partial gene segments of methyltransferase (MT), RNA dependent RNA polymerase (RdRp) and coat protein (CP) genes on RNA1, RNA2 and RNA3 respectively determined by sequence identity analysis
ApMV variants % identity cut-off				PDV variants % identity cut-off
Sample ID	RNA1 (Partial MT gene: 173bp)	RNA2 (Partial RdRp gene: 364bp)	RNA3 (Partial CP gene: 452bp)	Sample ID	RNA1 (Partial MT gene: 193bp)	RNA2 (Partial RdRp gene: 358bp)	RNA3 (Partial CP gene: 396bp)
K73	0.99	0.98	0.98	CNS3	0.98	98% & 98%	0.98
K74	0.98	0.99	0.98	CNS6	0.98	0.98	0.97
K75	0.98	0.97	0.98	K76	0.98	0.99	0.97
M35	0.98	0.98	0.98	NM20	0.97	0.98	0.98
M36	0.98	0.98	0.97	NM21	0.98	0.98	0.98
K73	0.98	0.98	0.98	NS3	0.98	0.98	0.98
				NS5	0.98	0.99	0.97
				NS7	0.98	0.97	0.98
				NS9	0.98	0.98	0.98
				PCH4	0.98	0.98	0.98
				Q1	0.98	0.98	0.98
				Q10	0.98	0.98	0.97
				Tas6	0.98	0.98	0.97
